# Supplementary material
Source: PubMed Central journal article supplement (PMC7610354)
Supplement: EMS118034-supplement-Supplementary_Information.pdf [file EMS118034-supplement-Supplementary_Information.pdf]

## Supplementary Code 1. Custom code used for TPM calculations.

---

---

##### This code was used to estimate expression of all Trinity assembled transcripts using quasi-mapping of Salmon in samples from TCGA or GTEx. Executable lines are marked with '>'. The bash script assumes the Salmon transcriptome index was generated prior to executing and is provided as first Argument. The bam or fastq file name is provided as second Argument.

```
> salmon index -t flattened_transcriptome.fasta -i ./transcriptome_index
```

Salmon version 0.8.2

SAMtools version 1.3.1

Python version 3.5.2

TCGA paired-end RNA-seq was downloaded through GDC portal as bam files. GTEx paired-end RNA-seq was downloaded with the SRA toolkit as fastq files. Hence, TCGA files were first converted to fastq files. Here, the following programs were used from [github.com/A-N-Other/pedestal](https://github.com/A-N-Other/pedestal): deinterleave (commit 169dd81) and interleavei (commit 800e78f). They are available under the permissive MIT license and we encourage code re-use and comment.

```
#####
```

```
##### Step 1
```

```
### file input & directory and test if file exists
```

```
> indexfile=$1
```

```
> bamname=$2 #collects string of input file from 1st argument (*.bam)
```

```
> fullfilename="${bamname##*/}"
```

```
> indirectory="${bamname%/*}"
```

```
> subdirectory="${indirectory##*/}"
```

```
> filename="${fullfilename%_gdc_realn_rehead.bam}"
```

```
#> filename="${fullfilename%_1.fastq.gz}" # for GTEx fastq files
```

```
> if [ -s ./countFiles/"$subdirectory"/"$filename".counts.gz ]; then
```

```
exit 3; fi
```

```
#####
```

```
#####
```

```
##### Step 2
```

```
### separate first and second read of every pair with deinterleave script
```

```
> samtools fastq -n "$bamname" | interleave -u -
```

```
| deinterleave ~/Scratch/tcgarecycle/fastq.files/"$filename"_1.fq
```

```
~/Scratch/tcgarecycle/fastq.files/"$filename"_2.fq
```

```
#####
```

#####

##### Step 3

### Expression estimate with Salmon quasi-mapping

```
> ~/bin/salmon-0.8.2/bin/salmon quant \  
    -p 8 -i "$indexfile" \  
    -l IU --seqBias --gcBias \  
    -1 ~/Scratch/tcgarecycle/fastq.files/"$filename"_1.fq \  
    -2 ~/Scratch/tcgarecycle/fastq.files/"$filename"_2.fq \  
    -o ./countFiles/"$subdirectory"/"$filename".tmpdirectory  
  
> mv ./countFiles/"$subdirectory"/"$filename".tmpdirectory/quant.sf \  
    ./countFiles/"$subdirectory"/"$filename".counts  
> mv ./countFiles/"$subdirectory"/"$filename".tmpdirectory/aux_info/ambig_info.tsv  
\  
    ./countFiles/"$subdirectory"/"$filename".ambig_info.tsv
```

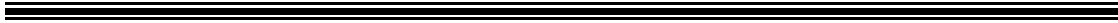

## Supplementary Table 1. Primers used in this study

### 5' RACE PCR primers

| Primer name | Sequence (5' – 3')     | Target            |
|-------------|------------------------|-------------------|
| GSP1        | TTTGTGCACATAAGGATCCTCC | Human <i>ACE2</i> |
| GSP2        | TTTGTCCCAGCCTGCTTC     | Human <i>ACE2</i> |

### RT-qPCR primers

| Primer name                       | Sequence (5' – 3')     | Target                                  |
|-----------------------------------|------------------------|-----------------------------------------|
| <i>ACE2</i> Forward               | GTAACGGACCCAGGAAAT     | Human <i>ACE2</i>                       |
| <i>MIRb-ACE2</i> Forward          | TACAAGTGCTTCATTGAGG    | Human <i>MIRb-ACE2</i>                  |
| Human <i>ACE2</i> Common Reverse  | CCATTGTACCTTTGTGC      | Human <i>ACE2</i> and <i>MIRb-ACE2</i>  |
| Vervet <i>Ace2</i> Forward        | CTAACTGATCCAGGAAAT     | Vervet <i>Ace2</i>                      |
| Vervet <i>MIRb-Ace2</i> Forward   | CACAAATGCTTCATTGAGG    | Vervet <i>MIRb-Ace2</i>                 |
| Vervet <i>Ace2</i> Common Reverse | CCATTGTACCTTTGTGC      | Vervet <i>Ace2</i> and <i>MIRb-Ace2</i> |
| Rabbit <i>Ace2</i> Forward        | CTAACTGAGCCAGGAGAT     | Rabbit <i>Ace2</i>                      |
| Rabbit <i>MIRb-Ace2</i> Forward   | TACAAGTGTTTCATTTAGA    | Rabbit <i>MIRb-Ace2</i>                 |
| Rabbit <i>Ace2</i> Common Reverse | CCATTGTTACTTTTGTGC     | Rabbit <i>Ace2</i> and <i>MIRb-Ace2</i> |
| Dog <i>Ace2</i> Forward           | CTAACTGAGCCAAGTGAC     | Dog <i>Ace2</i>                         |
| Dog <i>MIRb-Ace2</i> Forward      | TACAAATGTTTCATTGAGG    | Dog <i>MIRb-Ace2</i>                    |
| Dog <i>Ace2</i> Common Reverse    | CCATCGTTACCTTTGTGC     | Dog <i>Ace2</i> and <i>MIRb-Ace2</i>    |
| Mouse <i>Ace2</i> Forward         | ACTTCTCTAACATGTAAG     | Mouse <i>Ace2</i>                       |
| Mouse <i>MIRb-Ace2</i> Forward    | TACAAGTTGTGTATGTTCT    | Mouse <i>MIRb-Ace2</i>                  |
| Mouse <i>Ace2</i> Common Reverse  | GTCTCTTGCTACTTACAC     | Mouse <i>Ace2</i> and <i>MIRb-Ace2</i>  |
| <i>CXCL10</i> Forward             | TGCCATTCTGATTTGCTGCC   | Human <i>CXCL10</i>                     |
| <i>CXCL10</i> Reverse             | TGCAGGTACAGCGTACAGTT   | Human <i>CXCL10</i>                     |
| <i>CD274</i> Forward              | TACAGCTGAATTGGTCATCCCA | Human <i>CD274</i>                      |
| <i>CD274</i> Reverse              | TCAGTGCTACACCAAGGCAT   | Human <i>CD274</i>                      |
| <i>HPRT</i> Forward               | TGACACTGGCAAACAATGCA   | <i>HPRT</i> (all species)               |
| <i>HPRT</i> Reverse               | GGTCCTTTTACCAGCAAGCT   | <i>HPRT</i> (all species)               |
