# Supplementary material
Source: PubMed Central journal article supplement (PMC7610354)

Figure 4e

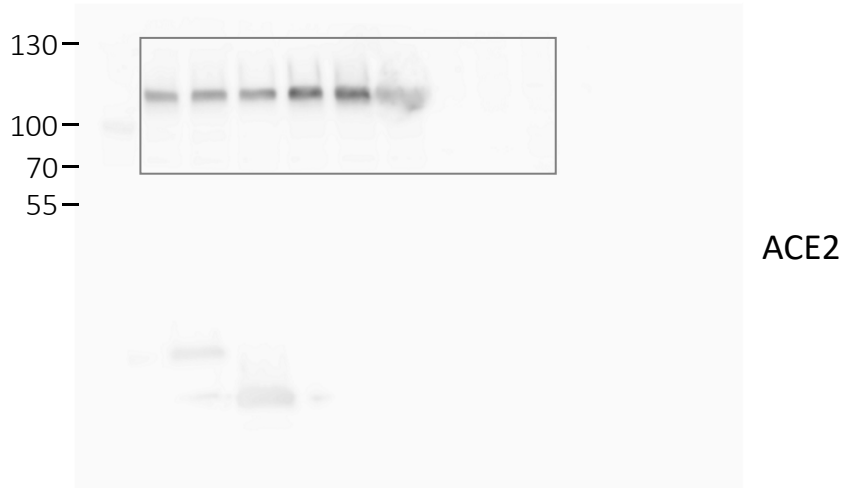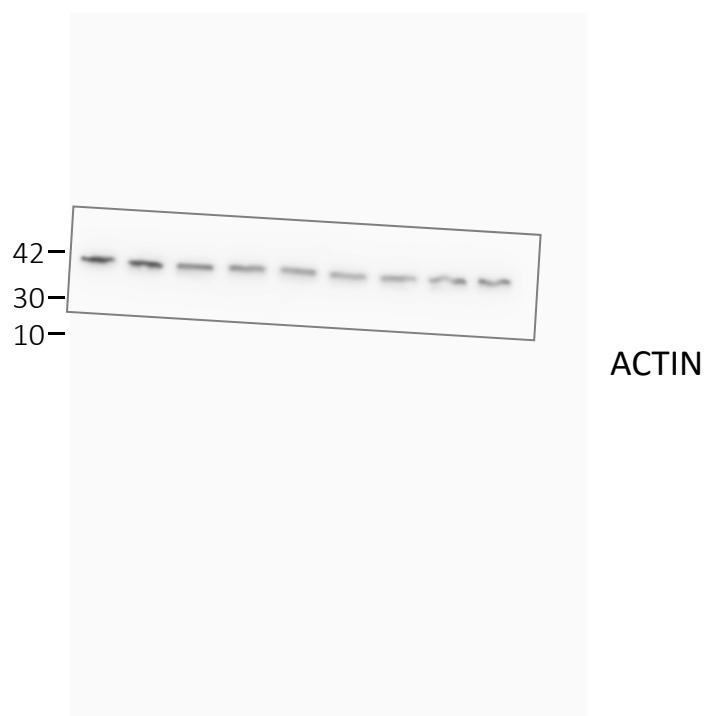

Supplement: EMS118034-supplement-Source_Data_Figure_4.pdf [file EMS118034-supplement-Source_Data_Figure_4.pdf]

Figure 5b

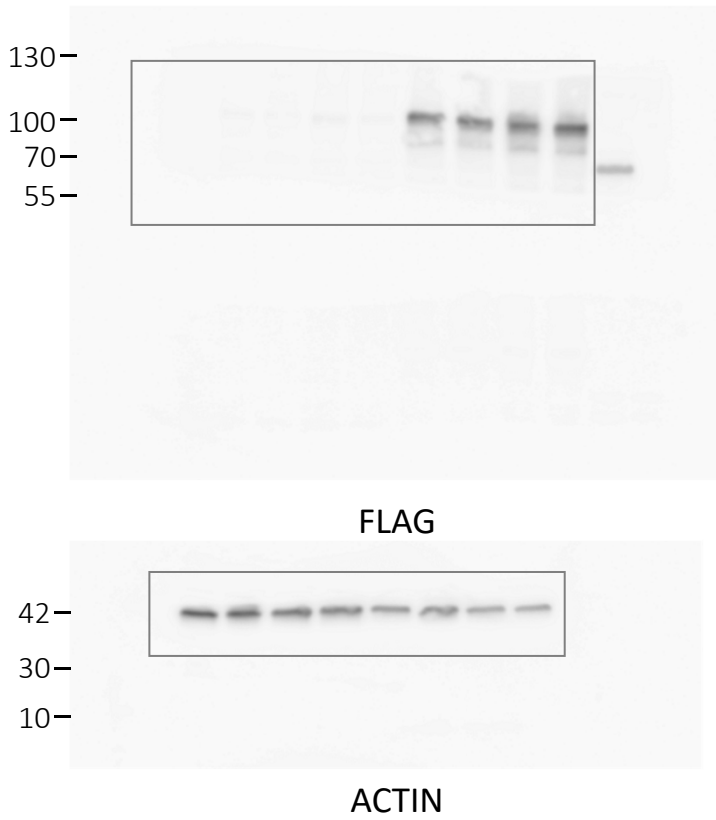

Figure 5d

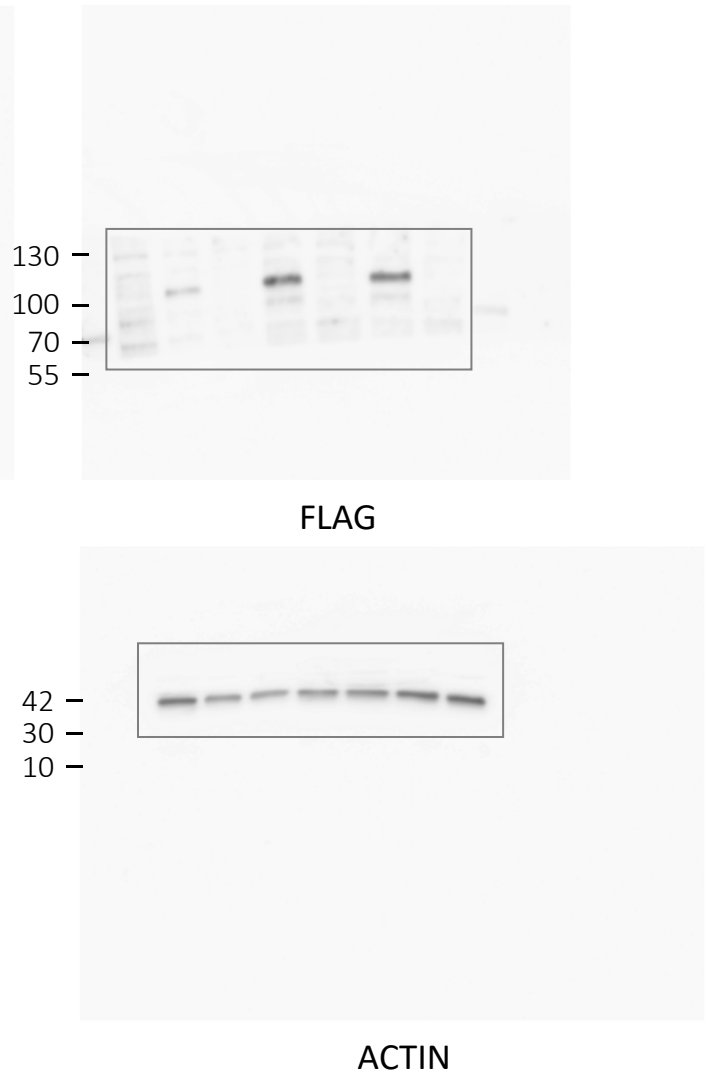

Figure 5c

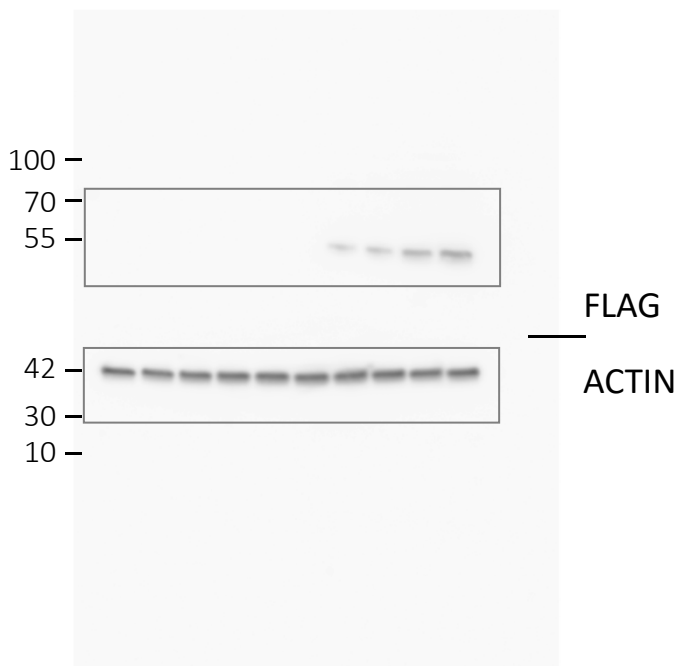

Figure 5e

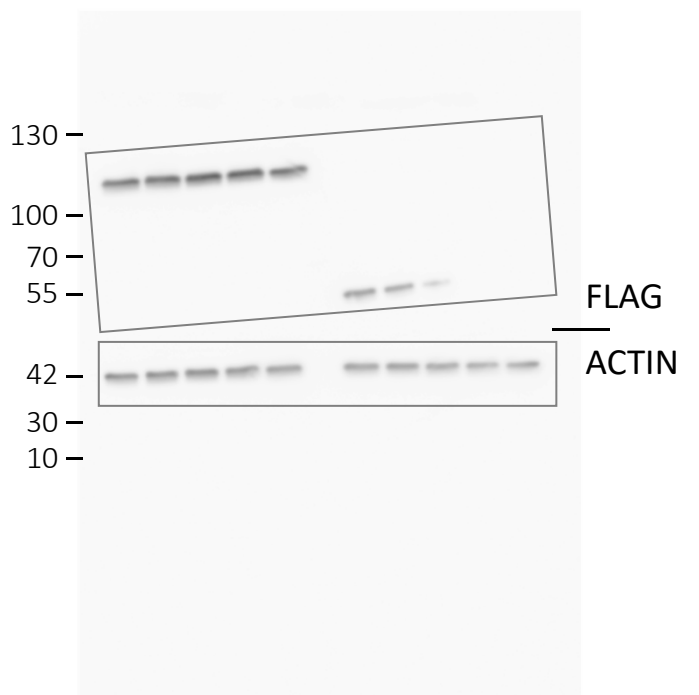

Supplement: EMS118034-supplement-Source_Data_Figure_5.pdf [file EMS118034-supplement-Source_Data_Figure_5.pdf]
